# Supplementary material for: Change of Positive Selection Pressure on HIV-1 Envelope Gene Inferred by Early and Recent Samples
Source: PLoS One. 2011 Apr 19;6(4):e18630. doi: 10.1371/journal.pone.0018630 (PMC3079721; doi:10.1371/journal.pone.0018630)
Supplement: Table S4 — Log-likelihood values and parameter estimates under the clade model using GTR+G model (CodonFreq = 2). (DOC) [file pone.0018630.s006.doc]

# Table S4 Log-likelihood values and parameter estimates under the clade model using the GTR+G tree (CodonFreq=2)

|  | Class 0 | Class 1 | Class 2 |
| --- | --- | --- | --- |
| Proportion | *p*0= 0.827 | *p*1 = 0.154 | *p*2 = 0.093 |
| All others | 0 = 0.049 | **1 = 1 | **2 = **5.719** |
| 1980s-within | 0 | **1 | **3 = **5.548** |
| 2000s-within | 0 | **1 | **4 = **3.497** |
| 1980s-between | 0 | **1 | **5 = **10.607** |
| 2000s-between | 0 | **1 | **6 = **4.680** |

Note. The log likelihood under this model is  = –31346.08. The likelihood ratio test statistic for testing *H*0: **3 = **4 is 2 = 24.463 and that for testing *H*0: **5 = **6 is 2 = 32.93. Both are significant with *p* < 1%.
